# Supplementary material for: Polymeric grating prism-based dual-mode miniature surface plasmon resonance sensor chip
Source: Royal Society of Chemistry journal article supplement (doi:10.1039/d4lf00236a), 2024-01-01
Supplement: d4lf00236a3.pdf [file d4lf00236a3.pdf]

## Supplementary document

### Polymeric Grating Prism-based Dual-mode Miniature Surface Plasmon Resonance Sensor Chip

Wisansaya Jaikandee<sup>a</sup>, Supeera Nootchanat<sup>b</sup>, Chutiparn Lertvachirapaiboon<sup>c</sup>,  
Sanong ekgasit<sup>b</sup>, Kazunari Shinbo<sup>a</sup>, Keizo Kato<sup>a</sup>, and Akira Baba<sup>a,\*</sup>

<sup>a</sup>Graduate School of Science and Technology and Faculty of Engineering, Niigata University 8050 Ikarashi 2-nocho, Nishi-ku, Niigata 950-2181, Japan

<sup>b</sup>Sensor Research Unit (SRU), Department of Chemistry, Faculty of Science, Chulalongkorn University, 254 Phayathai road, Pathumwan, Bangkok 10330, Thailand

<sup>c</sup>National Nanotechnology Center (NANOTEC), National Science and Technology Development Agency (NSTDA), Pathumthani 12120, Thailand

E-mail: [\\*ababa@eng.niigata-u.ac.jp](mailto:*ababa@eng.niigata-u.ac.jp)

#### (A) Preparation of a grating-PDMS circular disk

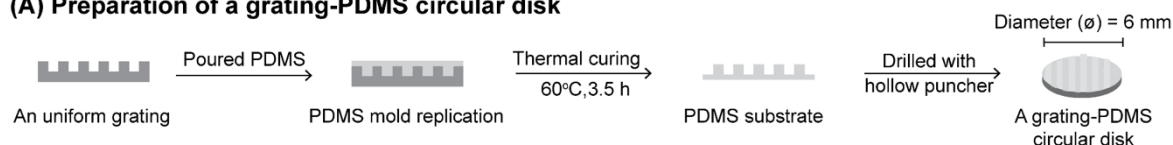

#### (B) Fabrication of a NOA 61 polymeric grating prism

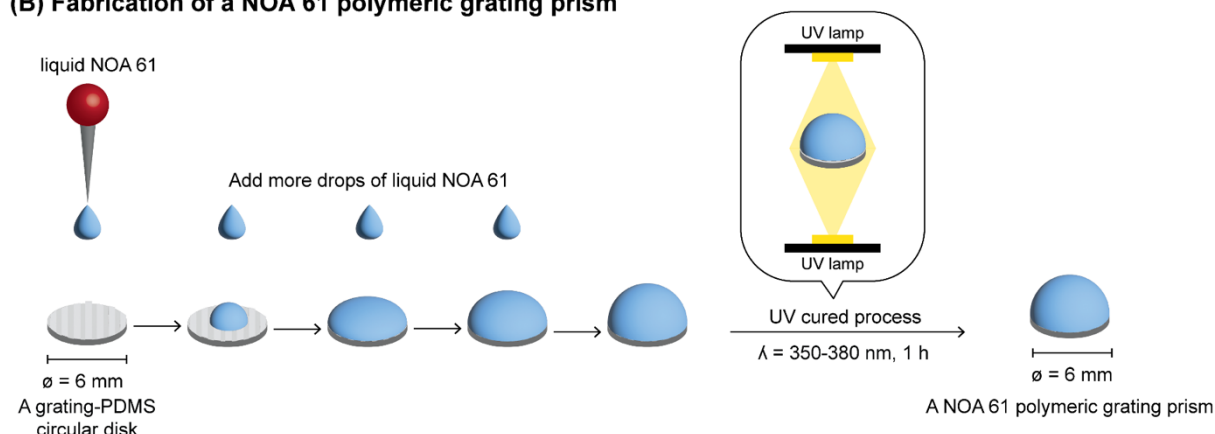

#### (C) Formation of metal films on the NOA 61 polymeric grating prism

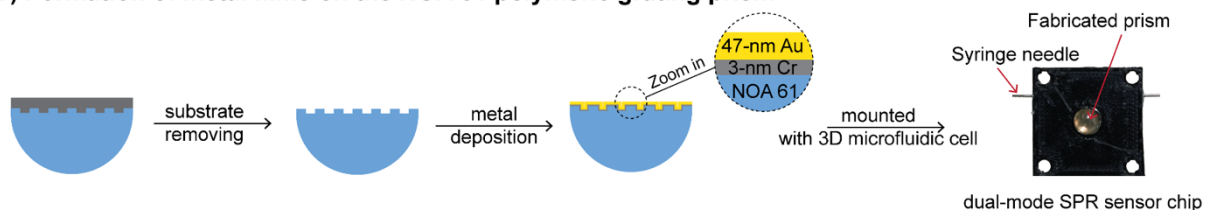

**Fig. S1** Schematic representation outlining the fabrication process for the dual-mode SPR sensor chip, comprising three key steps: (A) preparation of a grating–PDMS circular disk, (B) fabrication of a NOA 61 polymeric grating prism, and (C) completion of the sensor chip by depositing a Cr/Au film on the NOA 61 polymeric grating prism.

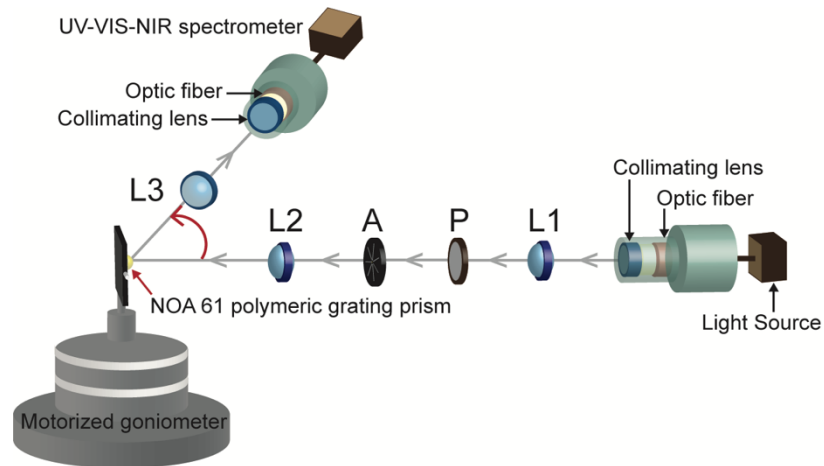

**Fig. S2** Schematic drawing illustrating a custom-built surface plasmon resonance (SPR) characterization setup based on wavelength modulation. The diagram features key components, each denoted by abbreviations for clarity: L for lens, P for linear polarizer, and A for optical aperture.

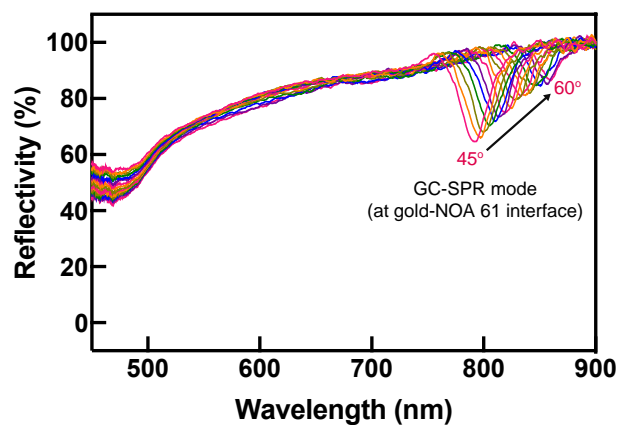

**Fig. S3** SPR reflectivity curves of a 100-nm gold-coated NOA 61 polymeric grating prism observed at incident angles ranging from 45° to 60°.

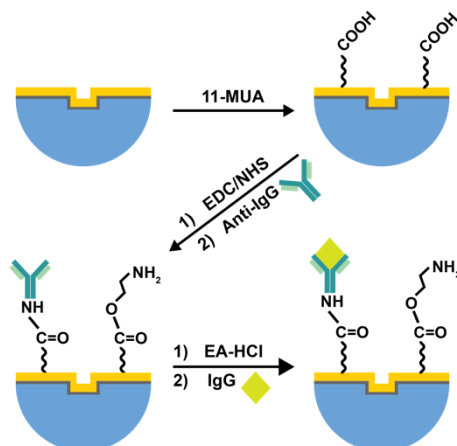

**Fig. S4** Schematic diagram depicting the creation of the SPR biosensor for detecting human IgG.

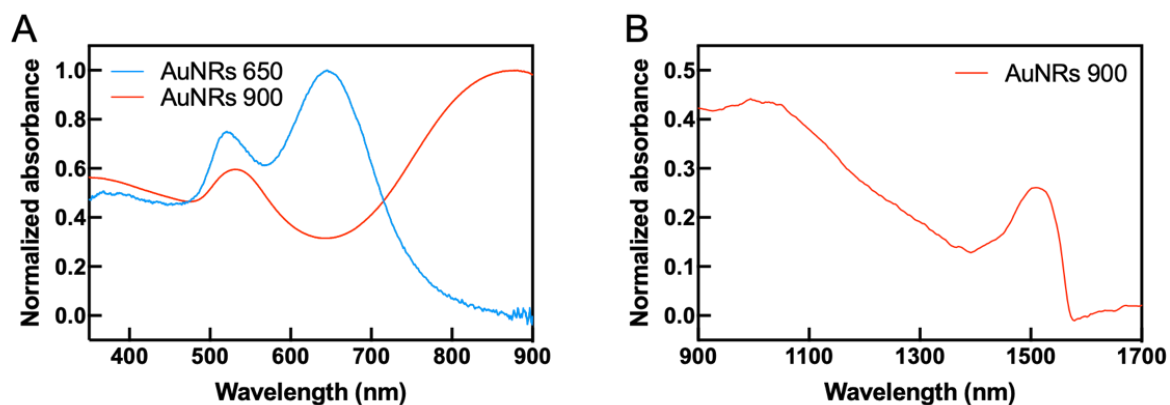

**Fig. S5** Normalized absorption spectrum of AuNRs 650 (blue line) and AuNRs 900 (red line) in (A) the UV-vis region spanning 350–900 nm and (B) the NIR region spanning 900–1700 nm.

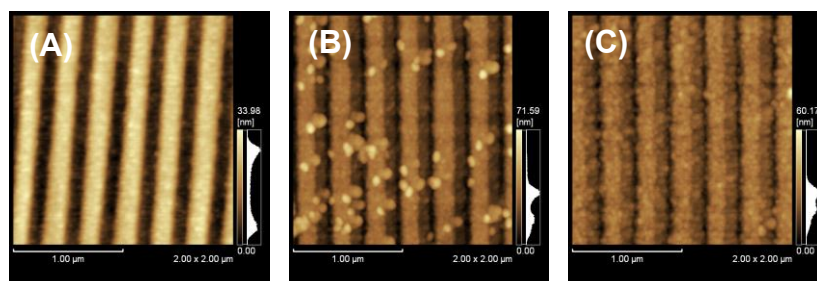

**Fig. S6** AFM images, each measuring  $2 \times 2 \mu\text{m}^2$ , of (A) the gold-coated NOA 61 polymeric grating prism, (B) 4 layers of AuNRs 650 on the gold-coated NOA 61 polymeric grating prism, and (C) 4 layers of AuNRs 900 on the gold-coated NOA 61 polymeric grating prism.
